# Supplementary material for: Ball with hair: modular functionalization of highly stable G-quadruplex DNA nano-scaffolds through N2-guanine modification
Source: PubMed Central journal article supplement — Nucleic Acids Res. 2017 May 11;45(11):6265–74. doi: 10.1093/nar/gkx243 (PMC5499775; doi:10.1093/nar/gkx243), 2017-05-11
Supplement: gkx243_Supp.pdf [file gkx243_Supp.pdf]

**Ball with Hair: Modular functionalization of highly stable G-quadruplex DNA  
nano-scaffolds through N2-guanine modification**

**Christopher Jacques Lech and Anh Tuấn Phan\***

Division of Physics and Applied Physics, School of Physical and Mathematical Sciences,

Nanyang Technological University, Singapore 637371

**Supporting Information**

Keywords: G-quadruplex, nanoparticle, stability, N2-modifications, functionalization

Running Title: N2-modifications to G-quadruplex

\*Corresponding author: [phantuan@ntu.edu.sg](mailto:phantuan@ntu.edu.sg)

## Supporting Material Contents:

|            |                                                                                                       |
|------------|-------------------------------------------------------------------------------------------------------|
| Table S1   | DNA Sequences explored in systematic study of N2-modification of (3+1) G-quadruplex nano-scaffold     |
| Table S2   | Classification of G-quadruplex conformation and stability                                             |
| Table S3   | Single N2-substitutions into a parallel G-quadruplex nano-scaffold construct                          |
| Table S4   | Nano-scaffold sequences containing multiple N2-modifications and their stabilities                    |
| Table S5   | Nano-scaffold sequences containing functional N2-modifications                                        |
| Figure S1  | NMR - single N2-methyl-guanine modifications ( <i>MET</i> ) - (3+1) G-quadruplex nano-scaffold        |
| Figure S2  | NMR - single N2-benzyl-guanine modifications ( <i>BEN</i> ) - (3+1) G-quadruplex nano-scaffold        |
| Figure S3  | NMR - single N2-6-amino-hexyl-guanine modifications ( <i>HEX</i> ) - (3+1) G-quadruplex nano-scaffold |
| Figure S4  | CD - single N2-methyl-guanine modifications ( <i>MET</i> ) - (3+1) G-quadruplex nano-scaffold         |
| Figure S5  | CD - single N2-benzyl-guanine modifications ( <i>BEN</i> ) - (3+1) G-quadruplex nano-scaffold         |
| Figure S6  | CD - single N2-6-amino-hexyl-guanine modifications ( <i>HEX</i> ) - (3+1) G-quadruplex nano-scaffold  |
| Figure S7  | NMR - single N2-modifications - parallel G-quadruplex nano-scaffold                                   |
| Figure S8  | Fraction folded curves of G-quadruplex forming sequences containing single MET substitutions          |
| Figure S9  | Fraction folded curves of G-quadruplex forming sequences containing single BEN substitutions          |
| Figure S10 | Fraction folded curves of G-quadruplex forming sequences containing single HEX substitutions          |
| Figure S11 | Formation and stability of N2-Ball-with-Hair construct in physiological conditions                    |
| Figure S12 | Non-denaturing PAGE investigating G-quadruplex nano-scaffold stoichiometry                            |

**Table S1.** DNA Sequences explored in systematic study of N2-modification of (3+1) G-quadruplex nano-scaffold

| Name    | Sequence |             |     |             |     |             |     |     |     |     |     |             |     |     |     |     |     |     |     |     |     |     |     |     |   |
|---------|----------|-------------|-----|-------------|-----|-------------|-----|-----|-----|-----|-----|-------------|-----|-----|-----|-----|-----|-----|-----|-----|-----|-----|-----|-----|---|
|         | 1        | 2           | 3   | 4           | 5   | 6           | 7   | 8   | 9   | 10  | 11  | 12          | 13  | 14  | 15  | 16  | 17  | 18  | 19  | 20  | 21  | 22  | 23  | 24  |   |
| Native  | TT       | GGG         | TTA | GGG         | TTA | GGG         | TTA | GGG | TTA | GGG | TTA | GGG         | TTA | GGG | TTA | GGG | TTA | GGG | TTA | GGG | TTA | GGG | TTA | GGG | A |
| Met-3   | TT       | <b>M</b> GG | TTA | GGG         | TTA | GGG         | TTA | GGG | TTA | GGG | TTA | GGG         | TTA | GGG | TTA | GGG | TTA | GGG | TTA | GGG | TTA | GGG | TTA | GGG | A |
| Met-4   | TT       | <b>G</b> MG | TTA | GGG         | TTA | GGG         | TTA | GGG | TTA | GGG | TTA | GGG         | TTA | GGG | TTA | GGG | TTA | GGG | TTA | GGG | TTA | GGG | TTA | GGG | A |
| Met-5   | TT       | <b>G</b> GM | TTA | GGG         | TTA | GGG         | TTA | GGG | TTA | GGG | TTA | GGG         | TTA | GGG | TTA | GGG | TTA | GGG | TTA | GGG | TTA | GGG | TTA | GGG | A |
| Met-9   | TT       | GGG         | TTA | <b>M</b> GG | TTA | GGG         | TTA | GGG | TTA | GGG | TTA | GGG         | TTA | GGG | TTA | GGG | TTA | GGG | TTA | GGG | TTA | GGG | TTA | GGG | A |
| Met-10  | TT       | GGG         | TTA | <b>G</b> MG | TTA | GGG         | TTA | GGG | TTA | GGG | TTA | GGG         | TTA | GGG | TTA | GGG | TTA | GGG | TTA | GGG | TTA | GGG | TTA | GGG | A |
| Met-11  | TT       | GGG         | TTA | <b>G</b> GM | TTA | GGG         | TTA | GGG | TTA | GGG | TTA | GGG         | TTA | GGG | TTA | GGG | TTA | GGG | TTA | GGG | TTA | GGG | TTA | GGG | A |
| Met-15  | TT       | GGG         | TTA | GGG         | TTA | <b>M</b> GG | TTA | GGG | TTA | GGG | TTA | GGG         | TTA | GGG | TTA | GGG | TTA | GGG | TTA | GGG | TTA | GGG | TTA | GGG | A |
| Met-16  | TT       | GGG         | TTA | GGG         | TTA | <b>G</b> MG | TTA | GGG | TTA | GGG | TTA | GGG         | TTA | GGG | TTA | GGG | TTA | GGG | TTA | GGG | TTA | GGG | TTA | GGG | A |
| Met-17  | TT       | GGG         | TTA | GGG         | TTA | <b>G</b> GM | TTA | GGG | TTA | GGG | TTA | GGG         | TTA | GGG | TTA | GGG | TTA | GGG | TTA | GGG | TTA | GGG | TTA | GGG | A |
| Met-21  | TT       | GGG         | TTA | GGG         | TTA | GGG         | TTA | GGG | TTA | GGG | TTA | <b>M</b> GG | TTA | GGG | A |
| Met-22  | TT       | GGG         | TTA | GGG         | TTA | GGG         | TTA | GGG | TTA | GGG | TTA | <b>G</b> MG | TTA | GGG | A |
| Met-23  | TT       | GGG         | TTA | GGG         | TTA | GGG         | TTA | GGG | TTA | GGG | TTA | <b>G</b> GM | TTA | GGG | A |
| Ben-3   | TT       | <b>B</b> GG | TTA | GGG         | TTA | GGG         | TTA | GGG | TTA | GGG | TTA | GGG         | TTA | GGG | TTA | GGG | TTA | GGG | TTA | GGG | TTA | GGG | TTA | GGG | A |
| Ben-4   | TT       | <b>G</b> BG | TTA | GGG         | TTA | GGG         | TTA | GGG | TTA | GGG | TTA | GGG         | TTA | GGG | TTA | GGG | TTA | GGG | TTA | GGG | TTA | GGG | TTA | GGG | A |
| Ben-5   | TT       | <b>G</b> GB | TTA | GGG         | TTA | GGG         | TTA | GGG | TTA | GGG | TTA | GGG         | TTA | GGG | TTA | GGG | TTA | GGG | TTA | GGG | TTA | GGG | TTA | GGG | A |
| Ben-9   | TT       | GGG         | TTA | <b>B</b> GG | TTA | GGG         | TTA | GGG | TTA | GGG | TTA | GGG         | TTA | GGG | TTA | GGG | TTA | GGG | TTA | GGG | TTA | GGG | TTA | GGG | A |
| Ben-10  | TT       | GGG         | TTA | <b>G</b> BG | TTA | GGG         | TTA | GGG | TTA | GGG | TTA | GGG         | TTA | GGG | TTA | GGG | TTA | GGG | TTA | GGG | TTA | GGG | TTA | GGG | A |
| Ben-11  | TT       | GGG         | TTA | <b>G</b> GB | TTA | GGG         | TTA | GGG | TTA | GGG | TTA | GGG         | TTA | GGG | TTA | GGG | TTA | GGG | TTA | GGG | TTA | GGG | TTA | GGG | A |
| Ben-15  | TT       | GGG         | TTA | GGG         | TTA | <b>B</b> GG | TTA | GGG | TTA | GGG | TTA | GGG         | TTA | GGG | TTA | GGG | TTA | GGG | TTA | GGG | TTA | GGG | TTA | GGG | A |
| Ben-16  | TT       | GGG         | TTA | GGG         | TTA | <b>G</b> BG | TTA | GGG | TTA | GGG | TTA | GGG         | TTA | GGG | TTA | GGG | TTA | GGG | TTA | GGG | TTA | GGG | TTA | GGG | A |
| Ben-17  | TT       | GGG         | TTA | GGG         | TTA | <b>G</b> GB | TTA | GGG | TTA | GGG | TTA | GGG         | TTA | GGG | TTA | GGG | TTA | GGG | TTA | GGG | TTA | GGG | TTA | GGG | A |
| Ben-21  | TT       | GGG         | TTA | GGG         | TTA | GGG         | TTA | GGG | TTA | GGG | TTA | <b>B</b> GG | TTA | GGG | A |
| Ben-22  | TT       | GGG         | TTA | GGG         | TTA | GGG         | TTA | GGG | TTA | GGG | TTA | <b>G</b> BG | TTA | GGG | A |
| Ben-23  | TT       | GGG         | TTA | GGG         | TTA | GGG         | TTA | GGG | TTA | GGG | TTA | <b>G</b> GB | TTA | GGG | A |
| Hex-3   | TT       | <b>H</b> GG | TTA | GGG         | TTA | GGG         | TTA | GGG | TTA | GGG | TTA | GGG         | TTA | GGG | TTA | GGG | TTA | GGG | TTA | GGG | TTA | GGG | TTA | GGG | A |
| Hex -4  | TT       | <b>G</b> HG | TTA | GGG         | TTA | GGG         | TTA | GGG | TTA | GGG | TTA | GGG         | TTA | GGG | TTA | GGG | TTA | GGG | TTA | GGG | TTA | GGG | TTA | GGG | A |
| Hex -5  | TT       | <b>G</b> GH | TTA | GGG         | TTA | GGG         | TTA | GGG | TTA | GGG | TTA | GGG         | TTA | GGG | TTA | GGG | TTA | GGG | TTA | GGG | TTA | GGG | TTA | GGG | A |
| Hex -9  | TT       | GGG         | TTA | <b>H</b> GG | TTA | GGG         | TTA | GGG | TTA | GGG | TTA | GGG         | TTA | GGG | TTA | GGG | TTA | GGG | TTA | GGG | TTA | GGG | TTA | GGG | A |
| Hex -10 | TT       | GGG         | TTA | <b>G</b> HG | TTA | GGG         | TTA | GGG | TTA | GGG | TTA | GGG         | TTA | GGG | TTA | GGG | TTA | GGG | TTA | GGG | TTA | GGG | TTA | GGG | A |
| Hex -11 | TT       | GGG         | TTA | <b>G</b> GH | TTA | GGG         | TTA | GGG | TTA | GGG | TTA | GGG         | TTA | GGG | TTA | GGG | TTA | GGG | TTA | GGG | TTA | GGG | TTA | GGG | A |
| Hex -15 | TT       | GGG         | TTA | GGG         | TTA | <b>H</b> GG | TTA | GGG | TTA | GGG | TTA | GGG         | TTA | GGG | TTA | GGG | TTA | GGG | TTA | GGG | TTA | GGG | TTA | GGG | A |
| Hex -16 | TT       | GGG         | TTA | GGG         | TTA | <b>G</b> HG | TTA | GGG | TTA | GGG | TTA | GGG         | TTA | GGG | TTA | GGG | TTA | GGG | TTA | GGG | TTA | GGG | TTA | GGG | A |
| Hex -17 | TT       | GGG         | TTA | GGG         | TTA | <b>G</b> GH | TTA | GGG | TTA | GGG | TTA | GGG         | TTA | GGG | TTA | GGG | TTA | GGG | TTA | GGG | TTA | GGG | TTA | GGG | A |
| Hex -21 | TT       | GGG         | TTA | GGG         | TTA | GGG         | TTA | GGG | TTA | GGG | TTA | <b>H</b> GG | TTA | GGG | A |
| Hex -22 | TT       | GGG         | TTA | GGG         | TTA | GGG         | TTA | GGG | TTA | GGG | TTA | <b>G</b> HG | TTA | GGG | A |
| Hex -23 | TT       | GGG         | TTA | GGG         | TTA | GGG         | TTA | GGG | TTA | GGG | TTA | <b>G</b> GH | TTA | GGG | A |

Position of N2-modified-guanines are indicated as such: N2-Methyl-Guanine (**M**), N2-benzyl-guanine (**B**), N2-6-amino-hexyl-guanine (**H**),

**Table S2.** Classification of G-quadruplex conformation and stability

| Sequence | NMR <sup>a</sup>     |                  |                        | UV (°C)                     |                  |
|----------|----------------------|------------------|------------------------|-----------------------------|------------------|
|          | Single Major Species | Minor Population | Multiple Major Species | T <sub>m</sub> <sup>b</sup> | Δ T <sub>m</sub> |
| Native   | •                    |                  |                        | 54.4 ± 0.4                  | -                |
| Met-3    |                      |                  |                        | 59.7 ± 0.2                  | 5.3              |
| Met-4    | •                    |                  |                        | 60.1 ± 0.7                  | 5.7              |
| Met-5    | •                    |                  |                        | 58.4 ± 0.5                  | 4.0              |
| Met-9    |                      | •                |                        | 62.7 ± 0.8                  | 8.3              |
| Met-10   | •                    |                  |                        | 58.5 ± 0.4                  | 4.1              |
| Met-11   | •                    |                  |                        | 57.8 ± 0.6                  | 3.5              |
| Met-15   | •                    |                  |                        | 59.9 ± 0.4                  | 5.6              |
| Met-16   | •                    |                  |                        | 57.5 ± 0.1                  | 3.1              |
| Met-17   |                      | •                |                        | 57.2 ± 0.3                  | 2.8              |
| Met-21   | •                    |                  |                        | 59.6 ± 0.3                  | 5.2              |
| Met-22   |                      | •                |                        | 59.9 ± 0.5                  | 5.5              |
| Met-23   | •                    |                  |                        | 56.9 ± 0.2                  | 2.5              |
| Ben-3    |                      | •                |                        | 60.7 ± 0.1                  | 6.3              |
| Ben-4    | •                    |                  |                        | 64.0 ± 0.5                  | 9.6              |
| Ben-5    |                      |                  | •                      | -                           | -                |
| Ben-9    | •                    |                  |                        | 67.7 ± 0.5                  | 13.3             |
| Ben-10   | •                    |                  |                        | 61.3 ± 0.4                  | 6.9              |
| Ben-11   | •                    |                  |                        | 61.9 ± 0.3                  | 7.5              |
| Ben-15   | •                    |                  |                        | 57.4 ± 0.1                  | 3.0              |
| Ben-16   |                      |                  | •                      | -                           | -                |
| Ben-17   |                      | •                |                        | 58.9 ± 0.5                  | 4.5              |
| Ben-21   | •                    |                  |                        | 62.3 ± 0.7                  | 8.0              |
| Ben-22   | •                    |                  |                        | 59.6 ± 0.3                  | 5.2              |
| Ben-23   |                      | •                |                        | 57.2 ± 0.3                  | 2.8              |
| Hex-3    | •                    |                  |                        | 63.6 ± 0.4                  | 9.2              |
| Hex-4    | •                    |                  |                        | 62.7 ± 0.4                  | 8.3              |
| Hex-5    |                      |                  | •                      | -                           | -                |
| Hex-9    | •                    |                  |                        | 63.5 ± 0.5                  | 9.1              |
| Hex-10   |                      |                  | •                      | -                           | -                |
| Hex-11   | •                    |                  |                        | 59.0 ± 0.4                  | 4.6              |
| Hex-15   | •                    |                  |                        | 59.7 ± 0.1                  | 5.3              |
| Hex-16   |                      |                  | •                      | -                           | -                |
| Hex-17   | •                    |                  |                        | 56.4 ± 0.3                  | 2.0              |
| Hex-21   |                      |                  | •                      | -                           | -                |
| Hex-22   | •                    |                  |                        | 62.3 ± 0.1                  | 7.9              |
| Hex-23   | •                    |                  |                        | 57.5 ± 0.0                  | 3.1              |

[a] Determination of the same (3+1) conformation being adopted is based off a qualitative analysis of the amount of minor conformation present in NMR spectra and the similarity of NMR and CD spectra between the modified and unmodified sequences.

[b] The ± values indicated the hysteresis observed between heating and cooling curves in UV melting experiments

**Table S3.** Single N2-substitutions into a parallel G-quadruplex nano-scaffold construct

| Sequence |     |   |             |   |     |   |     |   |     |    |     |    |     |    |     |    |     |
|----------|-----|---|-------------|---|-----|---|-----|---|-----|----|-----|----|-----|----|-----|----|-----|
| 1        | 2   | 3 | 4           | 5 | 6   | 7 | 8   | 9 | 10  | 11 | 12  | 13 | 14  | 15 | 16  | 17 | 18  |
| TT       | GGG | T | GGG         | T | GGG | T | GGG | T | GGG | T  | GGG | T  | GGG | T  | GGG | T  | GGG |
| TT       | GGG | T | <b>M</b> GG | T | GGG | T | GGG | T | GGG | T  | GGG | T  | GGG | T  | GGG | T  | GGG |
| TT       | GGG | T | <b>G</b> MG | T | GGG | T | GGG | T | GGG | T  | GGG | T  | GGG | T  | GGG | T  | GGG |
| TT       | GGG | T | <b>G</b> GM | T | GGG | T | GGG | T | GGG | T  | GGG | T  | GGG | T  | GGG | T  | GGG |
| TT       | GGG | T | <b>B</b> GG | T | GGG | T | GGG | T | GGG | T  | GGG | T  | GGG | T  | GGG | T  | GGG |
| TT       | GGG | T | <b>G</b> BG | T | GGG | T | GGG | T | GGG | T  | GGG | T  | GGG | T  | GGG | T  | GGG |
| TT       | GGG | T | <b>G</b> GB | T | GGG | T | GGG | T | GGG | T  | GGG | T  | GGG | T  | GGG | T  | GGG |
| TT       | GGG | T | <b>H</b> GG | T | GGG | T | GGG | T | GGG | T  | GGG | T  | GGG | T  | GGG | T  | GGG |
| TT       | GGG | T | <b>G</b> HG | T | GGG | T | GGG | T | GGG | T  | GGG | T  | GGG | T  | GGG | T  | GGG |
| TT       | GGG | T | <b>G</b> GH | T | GGG | T | GGG | T | GGG | T  | GGG | T  | GGG | T  | GGG | T  | GGG |

The position of N2-modified-guanines are indicated as such: N2-Methyl-Guanine (**M**), N2-benzyl-guanine (**B**), N2-6-amino-hexyl-guanine (**H**)

**Table S4.** Nano-scaffold sequences containing multiple N2-modifications and their stabilities

| Name              | Sequence <sup>[a]</sup>                                      | T <sub>m</sub> <sup>b</sup> | ΔT <sub>m</sub> |
|-------------------|--------------------------------------------------------------|-----------------------------|-----------------|
| Native            | TT GGG TTA GGG TTA GGG TTA GGG A                             | 45.5 ± 0.2                  | -               |
| N2-One-Groove     | TT GGG TTA <b>GMM</b> TTA GGG TTA GGG A                      | 52.4 ± 1.0                  | 6.9             |
| N2-Two-Groove     | TT <b>H</b> GG TTA <b>H</b> GG TTA GGG TTA GGG A             | 63.8 ± 0.3                  | 18.2            |
| N2-All-Groove     | TT <b>H</b> GG TTA <b>HGM</b> TTA <b>M</b> GG TTA GGG A      | 72.1 ± 0.2                  | 26.6            |
| N2-Ball-with-Hair | TT <b>HHG</b> TTA <b>HGH</b> TTA <b>HGH</b> TTA <b>GHH</b> A | 91.7 ± 0.1 <sup>c</sup>     | 46.2            |

Samples were examined in “Low Salt” conditions (1 mM KPi + 1 mM KCl).

[a] The position of N2-modified guanines is given by the following notation: “**M**” for MetG; “**H**” for HexG

[b] ± indicate the hysteresis between heating and cooling curves in CD melting experiments

[c] Incomplete melting transition observed. T<sub>m</sub> determined by single base line correction with high temperature baseline set to a constant of ≈0 absorbance

**Table S5.** Nano-scaffold sequences containing functional N2-modifications

| Name             | Sequence <sup>[a]</sup> |     |     |     |          |     |     |     |     |                            | T <sub>m</sub> <sup>b</sup> | ΔT <sub>m</sub> |    |    |    |    |    |    |    |    |    |    |    |    |  |            |     |
|------------------|-------------------------|-----|-----|-----|----------|-----|-----|-----|-----|----------------------------|-----------------------------|-----------------|----|----|----|----|----|----|----|----|----|----|----|----|--|------------|-----|
|                  | 1                       | 2   | 3   | 4   | 5        | 6   | 7   | 8   | 9   | 10                         | 11                          | 12              | 13 | 14 | 15 | 16 | 17 | 18 | 19 | 20 | 21 | 22 | 23 | 24 |  |            |     |
| Native           | TT                      | GGG | TTA | GGG | TTA      | GGG | TTA | GGG | TTA | GGG                        | A                           |                 |    |    |    |    |    |    |    |    |    |    |    |    |  | 54.4 ± 0.4 |     |
| <i>Bio-22</i>    | TT                      | GGG | TTA | GGG | TTA      | GGG | TTA | GGG | TTA | <b>G</b> <u><b>Q</b></u> G | A                           |                 |    |    |    |    |    |    |    |    |    |    |    |    |  | 56.0 ± 0.6 | 1.7 |
| <i>Bio-11-22</i> | TT                      | GGG | TTA | GG  | <b>Q</b> | TTA | GGG | TTA | GG  | <b>Q</b>                   | A                           |                 |    |    |    |    |    |    |    |    |    |    |    |    |  | 57.8 ± 0.2 | 3.4 |

Samples were examined in “Moderate Salt” conditions (10 mM KPi + 10 mM KCl).

[a] The position of N2-modified-guanines are indicated as such: N2-Biotin-Guanine (**Q**)

[b] ± indicate the hysteresis between heating and cooling curves in UV melting experiments

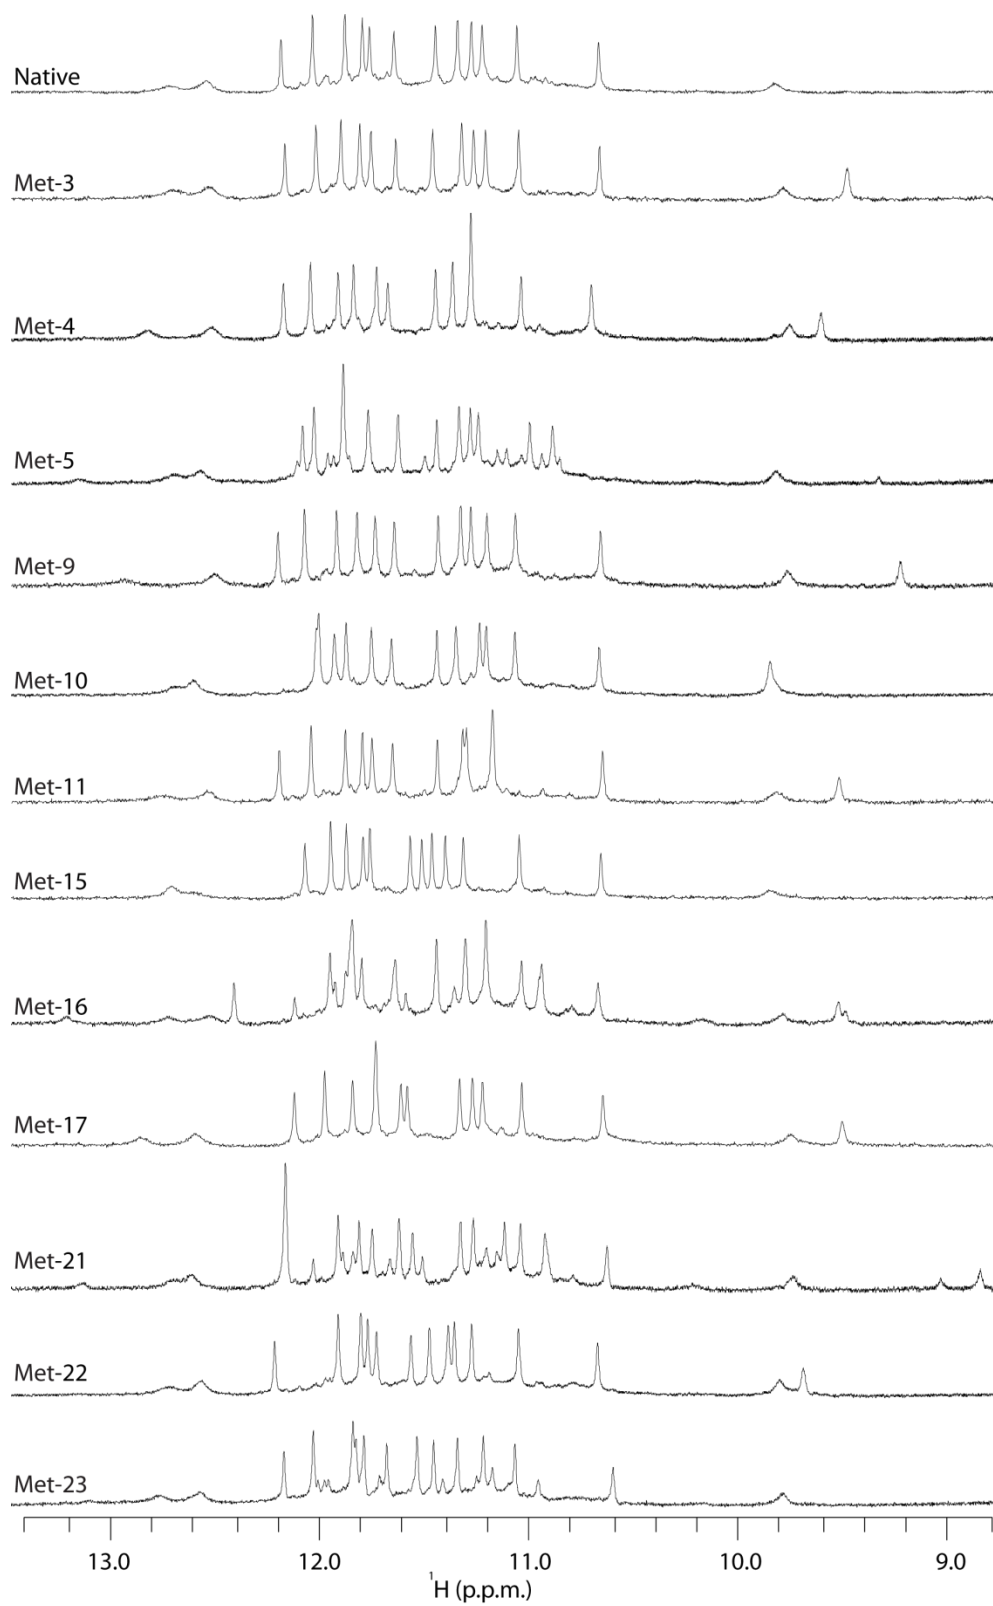

**Figure S1.** NMR spectra of single N2-methyl-guanine modifications (*MET*) to the (3+1) G-quadruplex nano-scaffold

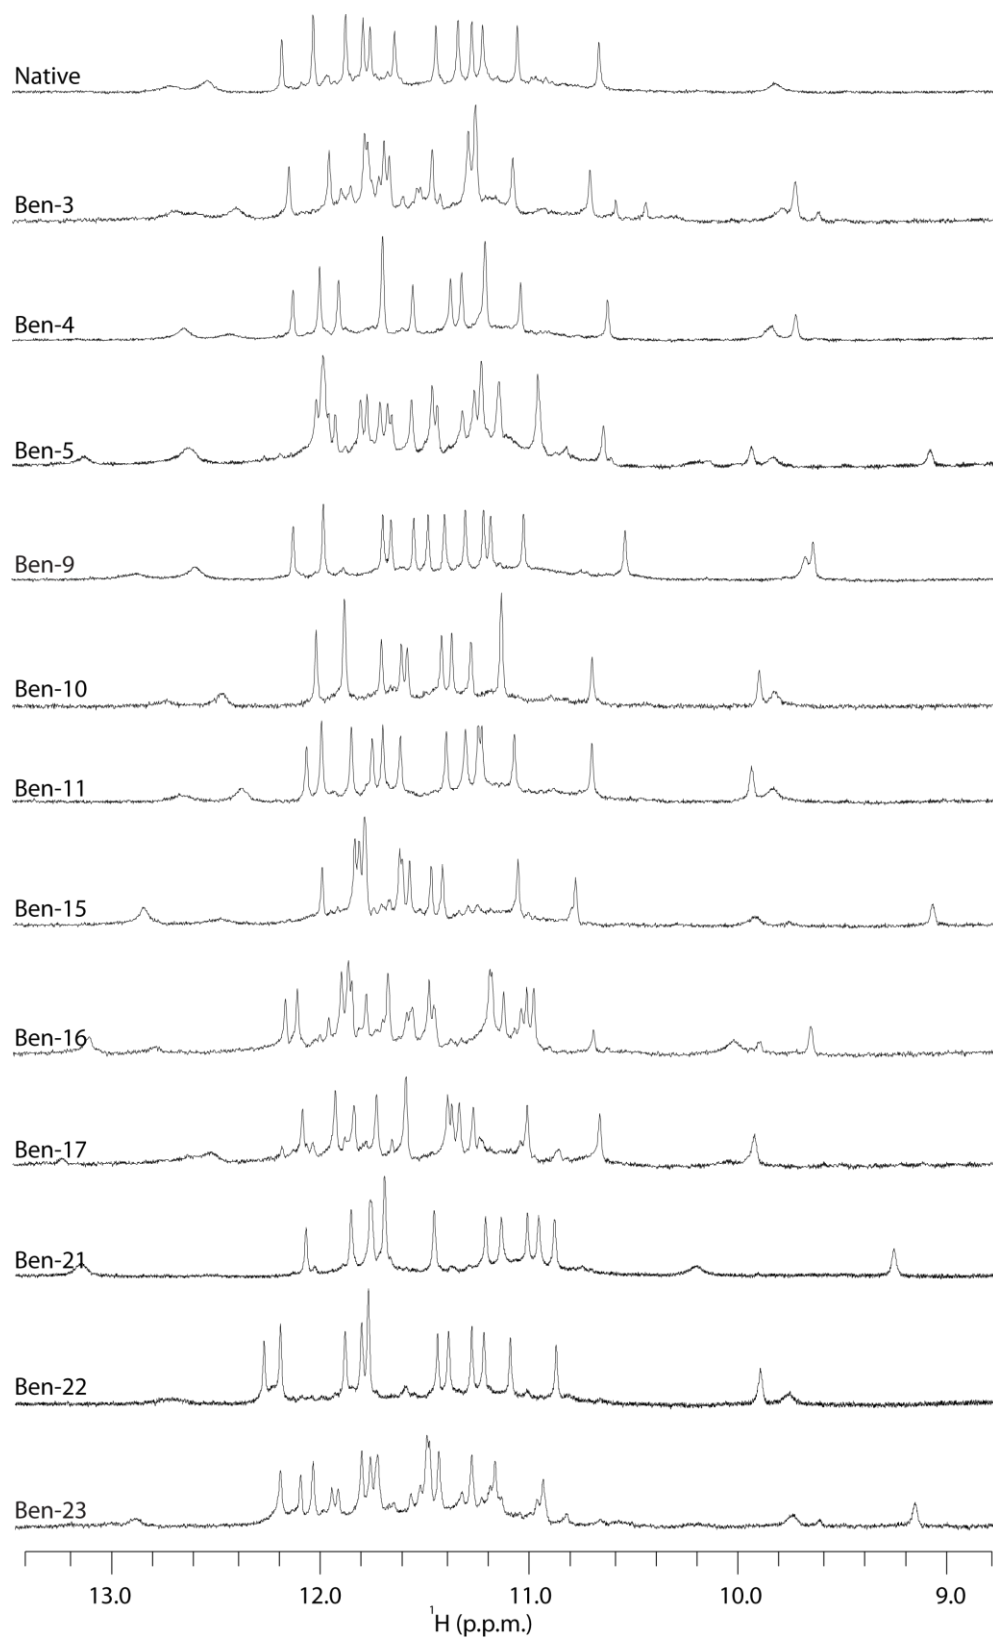

**Figure S2.** NMR spectra of single N2-benzyl-guanine modifications (*BEN*) to the (3+1) G-quadruplex nano-scaffold



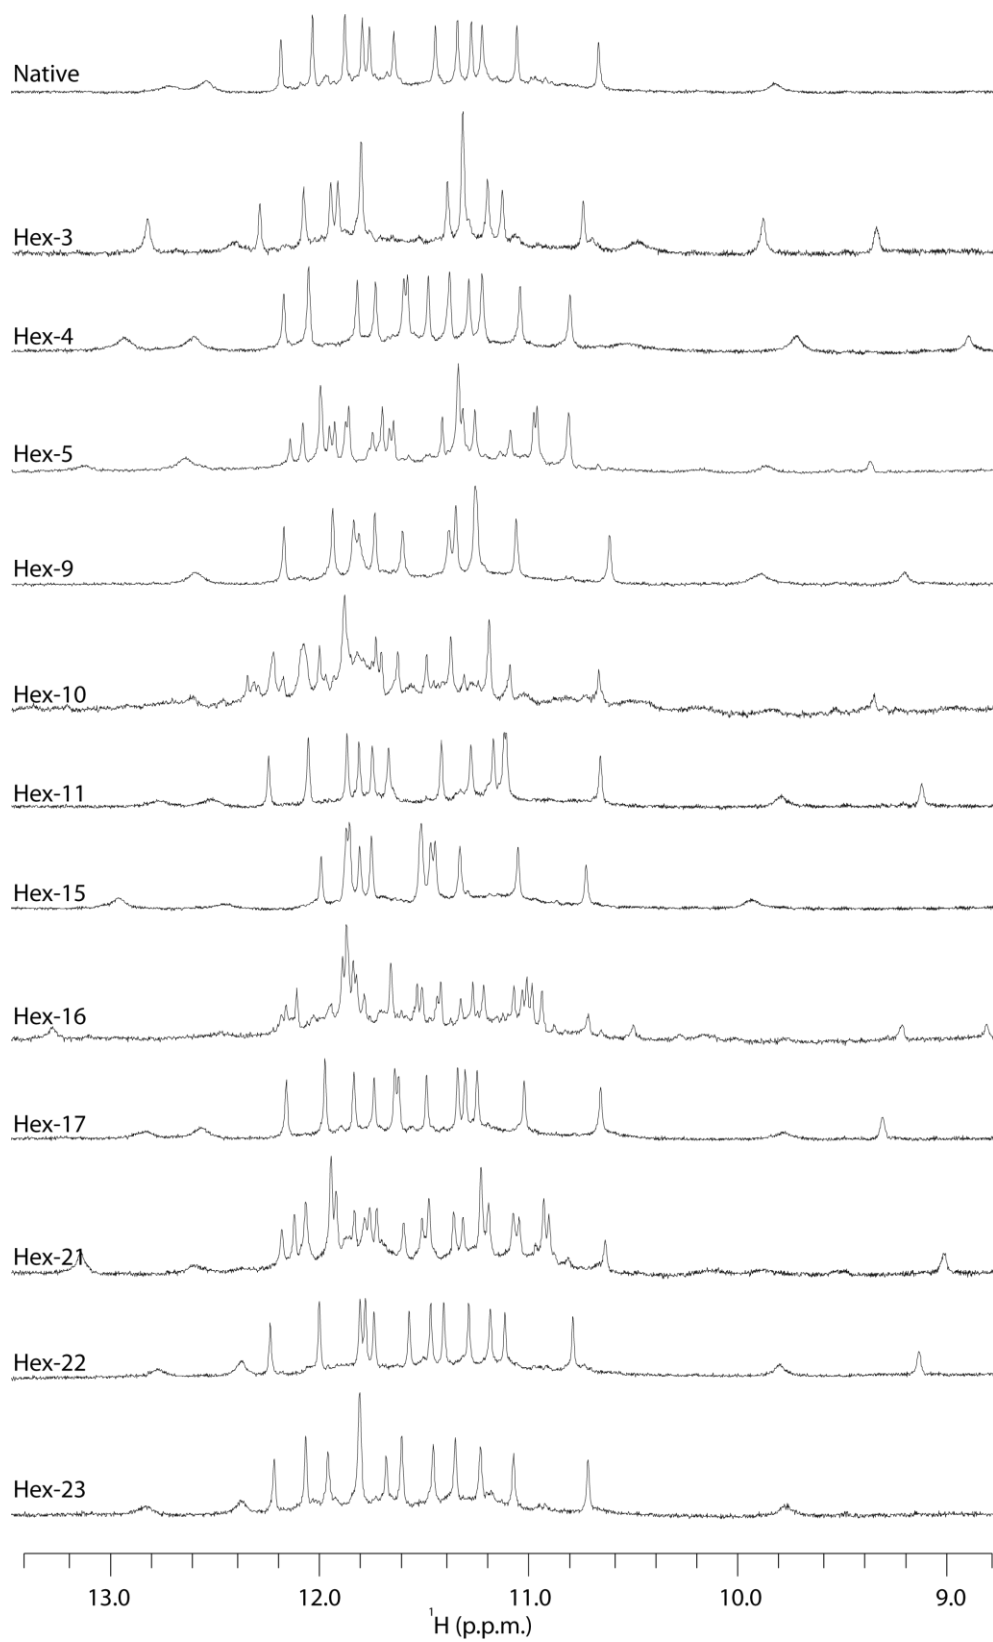

**Figure S3.** NMR spectra of single N2-6-amino-hexyl-guanine modifications (*HEX*) to the (3+1) G-quadruplex nano-scaffold

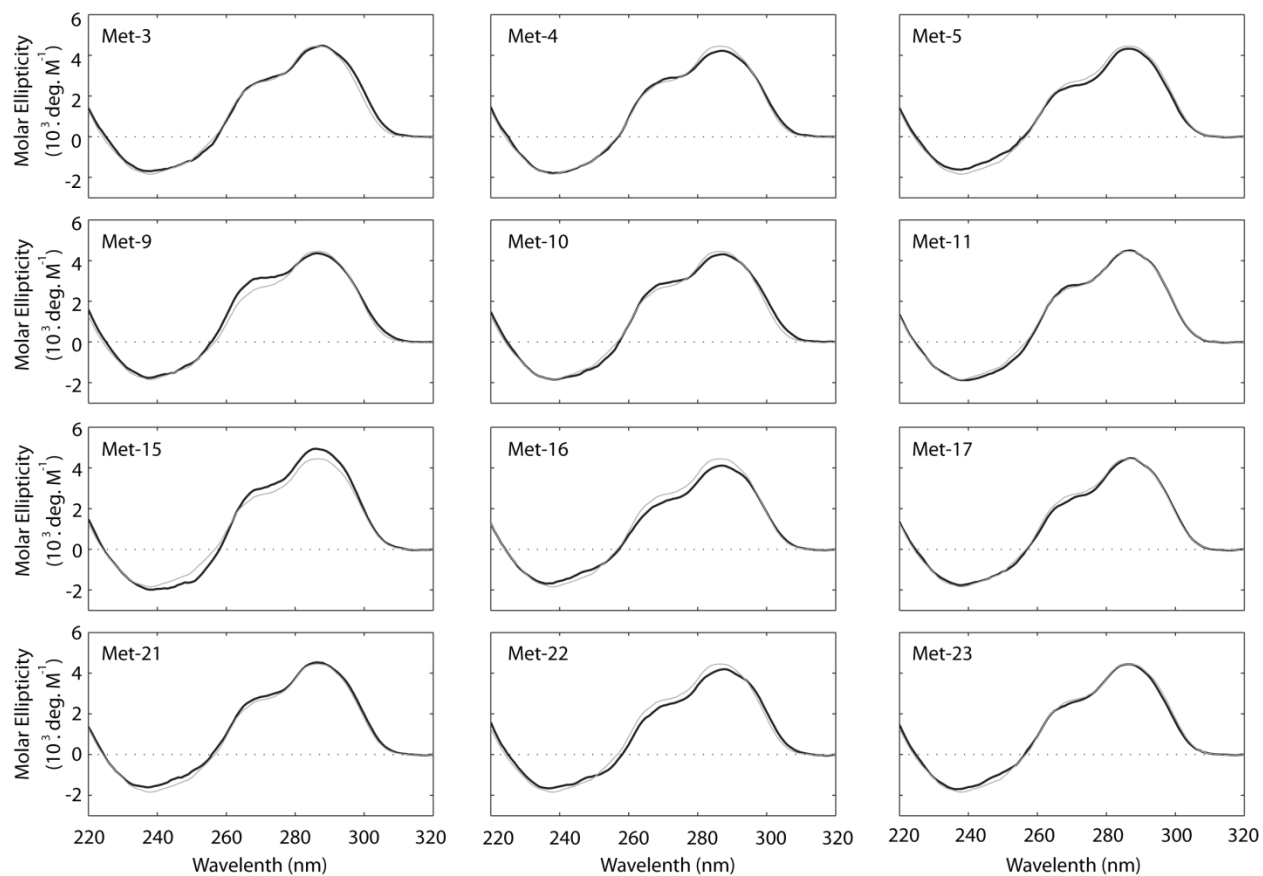

**Figure S4.** CD spectra of single N2-methyl-guanine (*MET*) modifications to the (3+1) G-quadruplex nano-scaffold. Modified sequences are shown in black. The *Native* reference sequence is shown in grey.

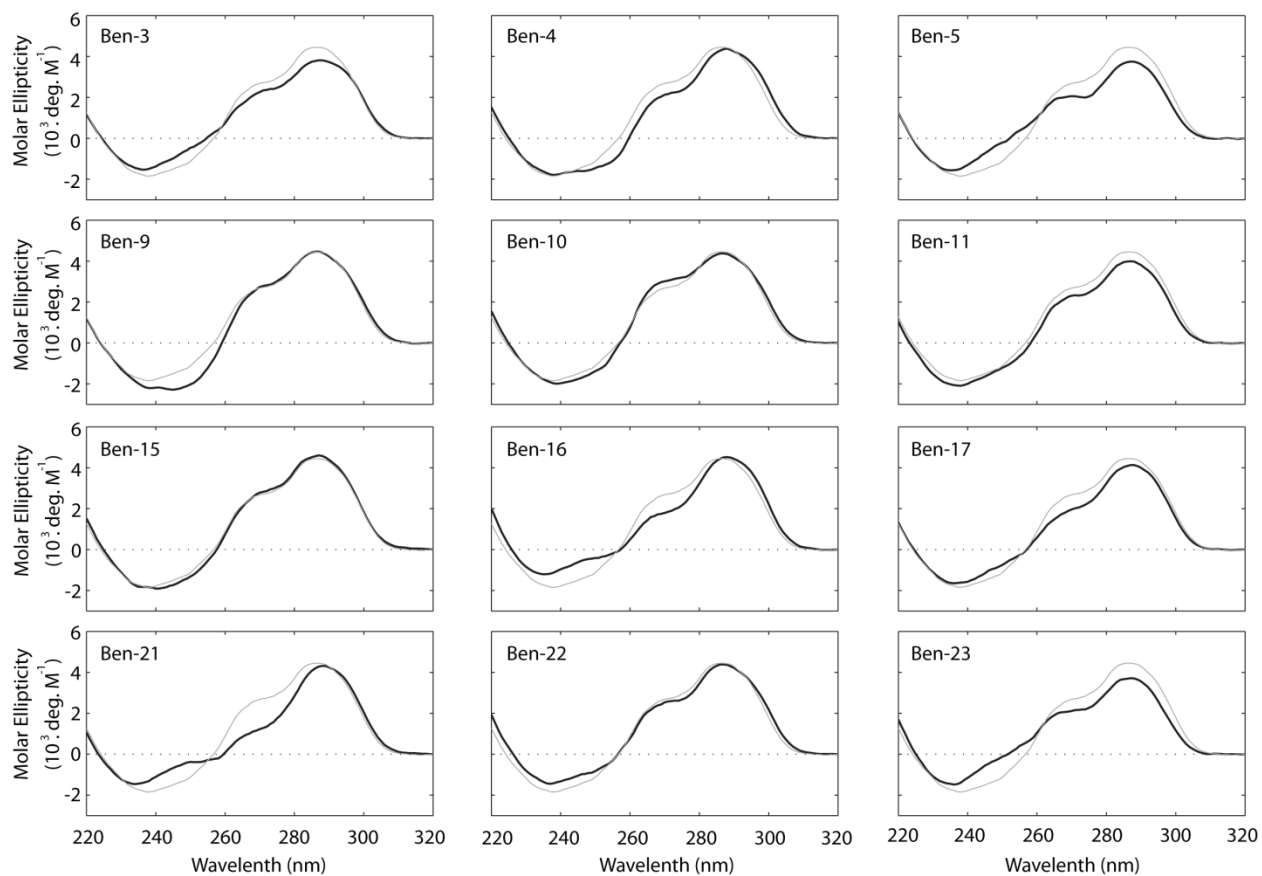

**Figure S5.** CD spectra of single N2-benzyl-guanine (*BEN*) modifications to the (3+1) G-quadruplex nano-scaffold. Modified sequences are shown in black. The *Native* reference sequence is shown in grey

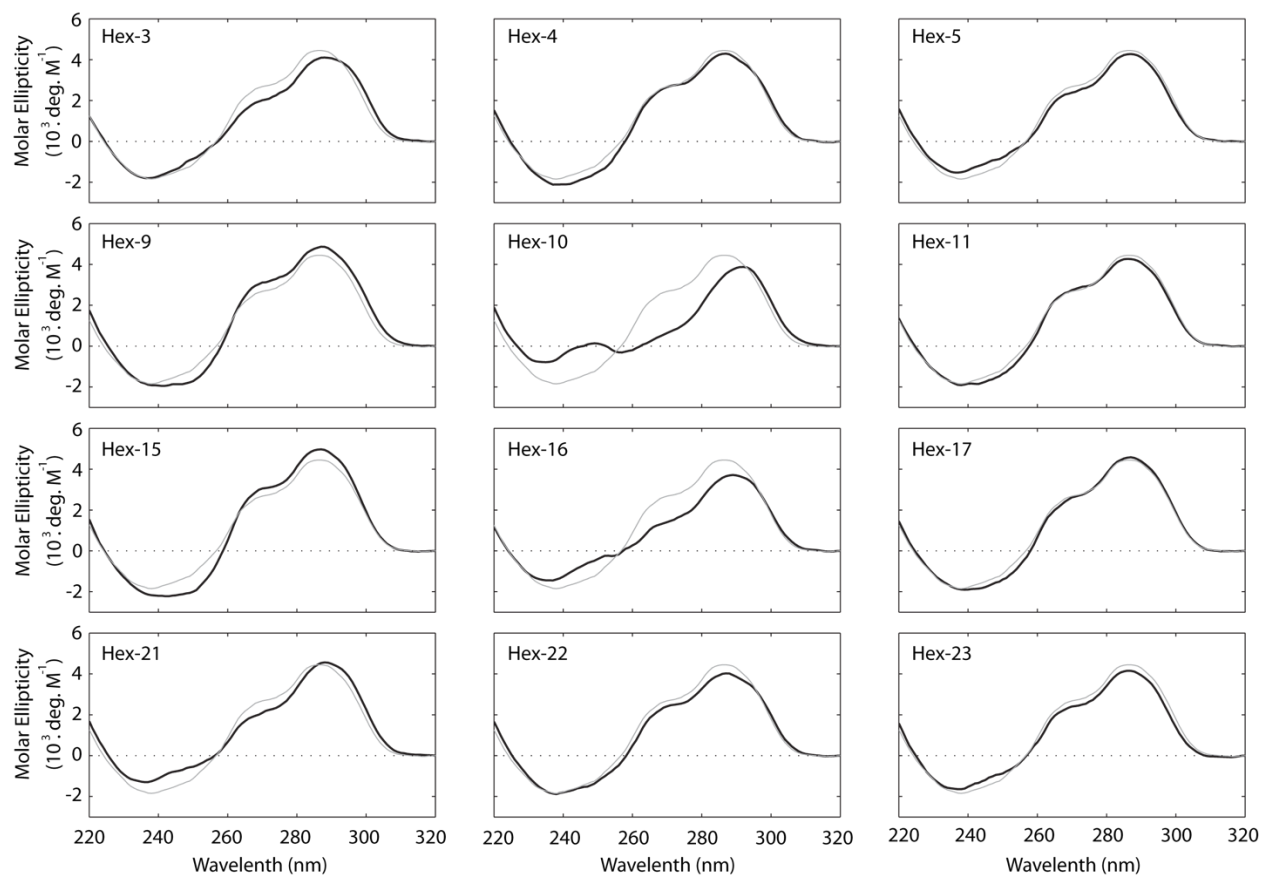

**Figure S6.** CD spectra of single N2-6-amino-hexyl-guanine (*HEX*) modifications to the (3+1) G-quadruplex nano-scaffold. Modified sequences are shown in black. The *Native* reference sequence is shown in grey

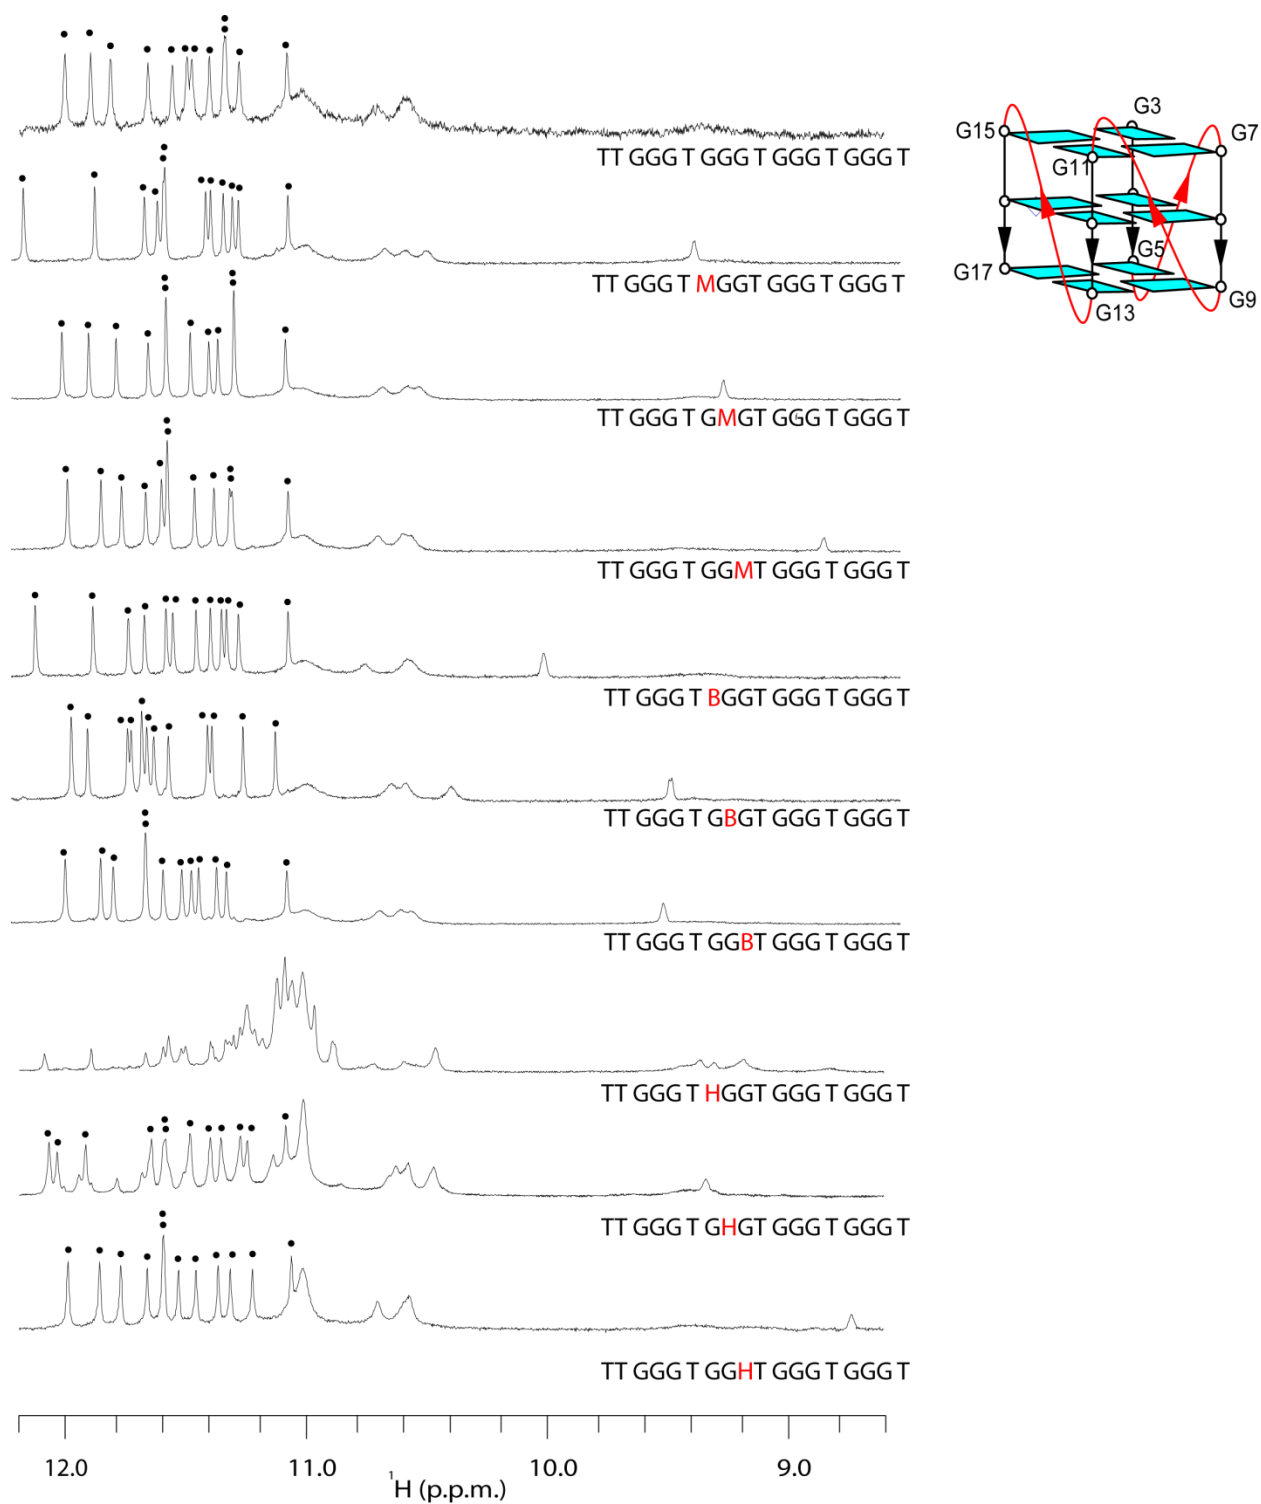

**Figure S7.** NMR spectra of single substations of N2-methyl-guanine (M), N2-benzyl-guanine (B), or N2-6-amino-hexyl-guanine (H) into the parallel G-quadruplex nano-scaffold formed by the d[T<sub>2</sub>(G<sub>3</sub>T)<sub>4</sub>] sequence. Substitution position indicated in red. Black dots indicate imino proton resonances of the monomer G-quadruplex.

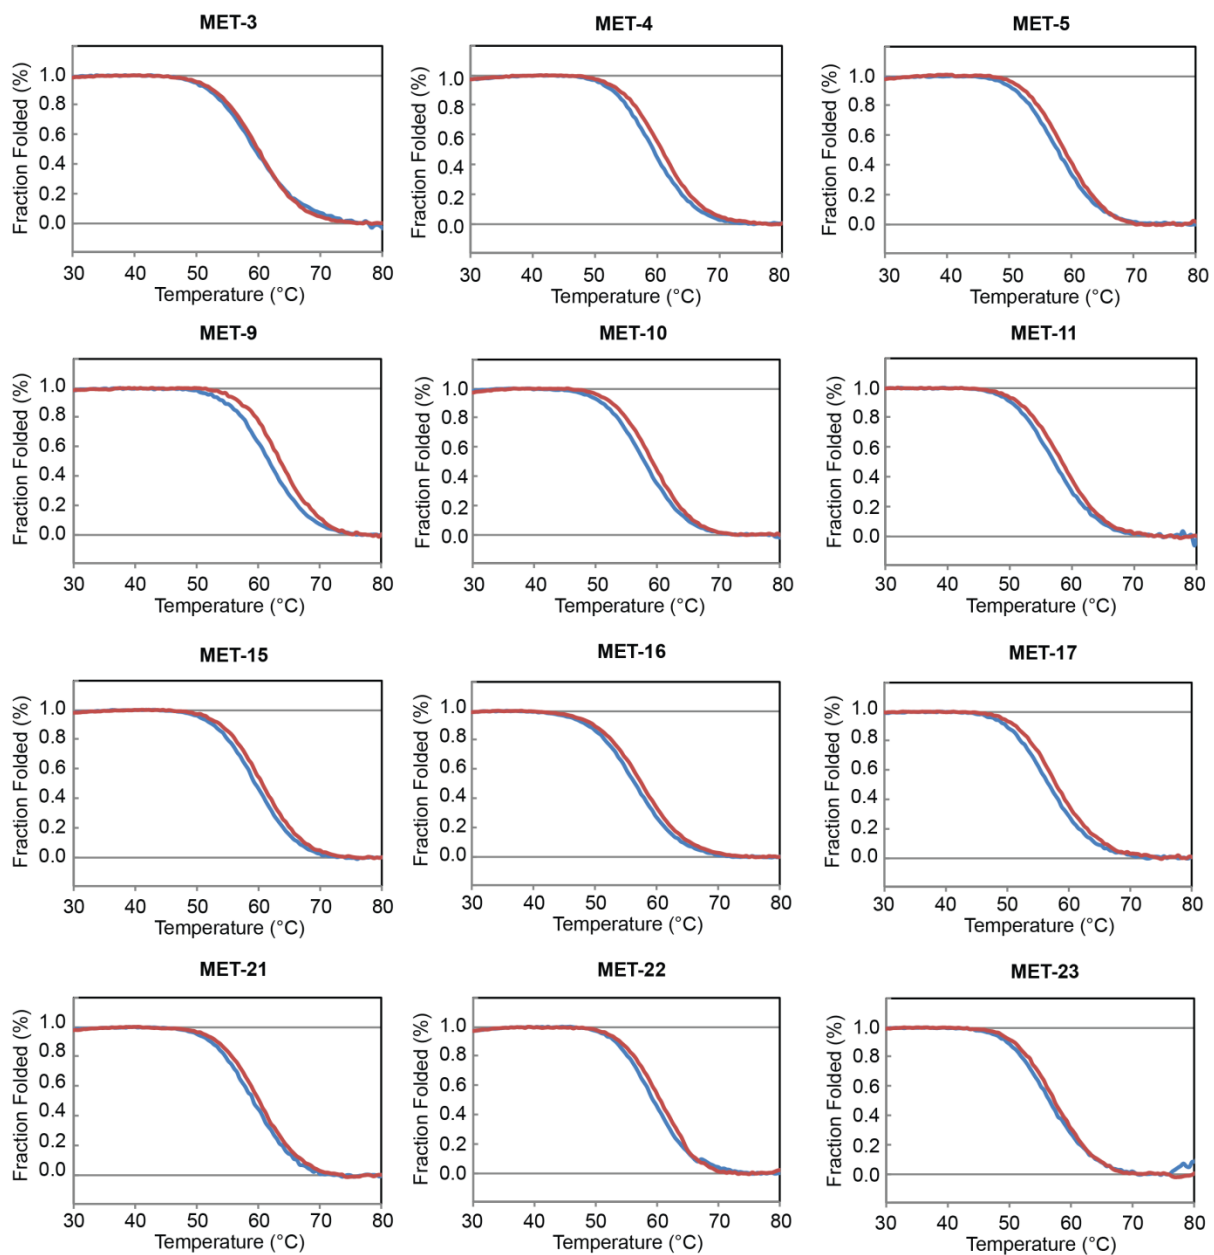

**Figure S8.** Fraction folded curves from UV melting experiments of modified (3+1) G-quadruplex forming sequences containing single MET substitutions

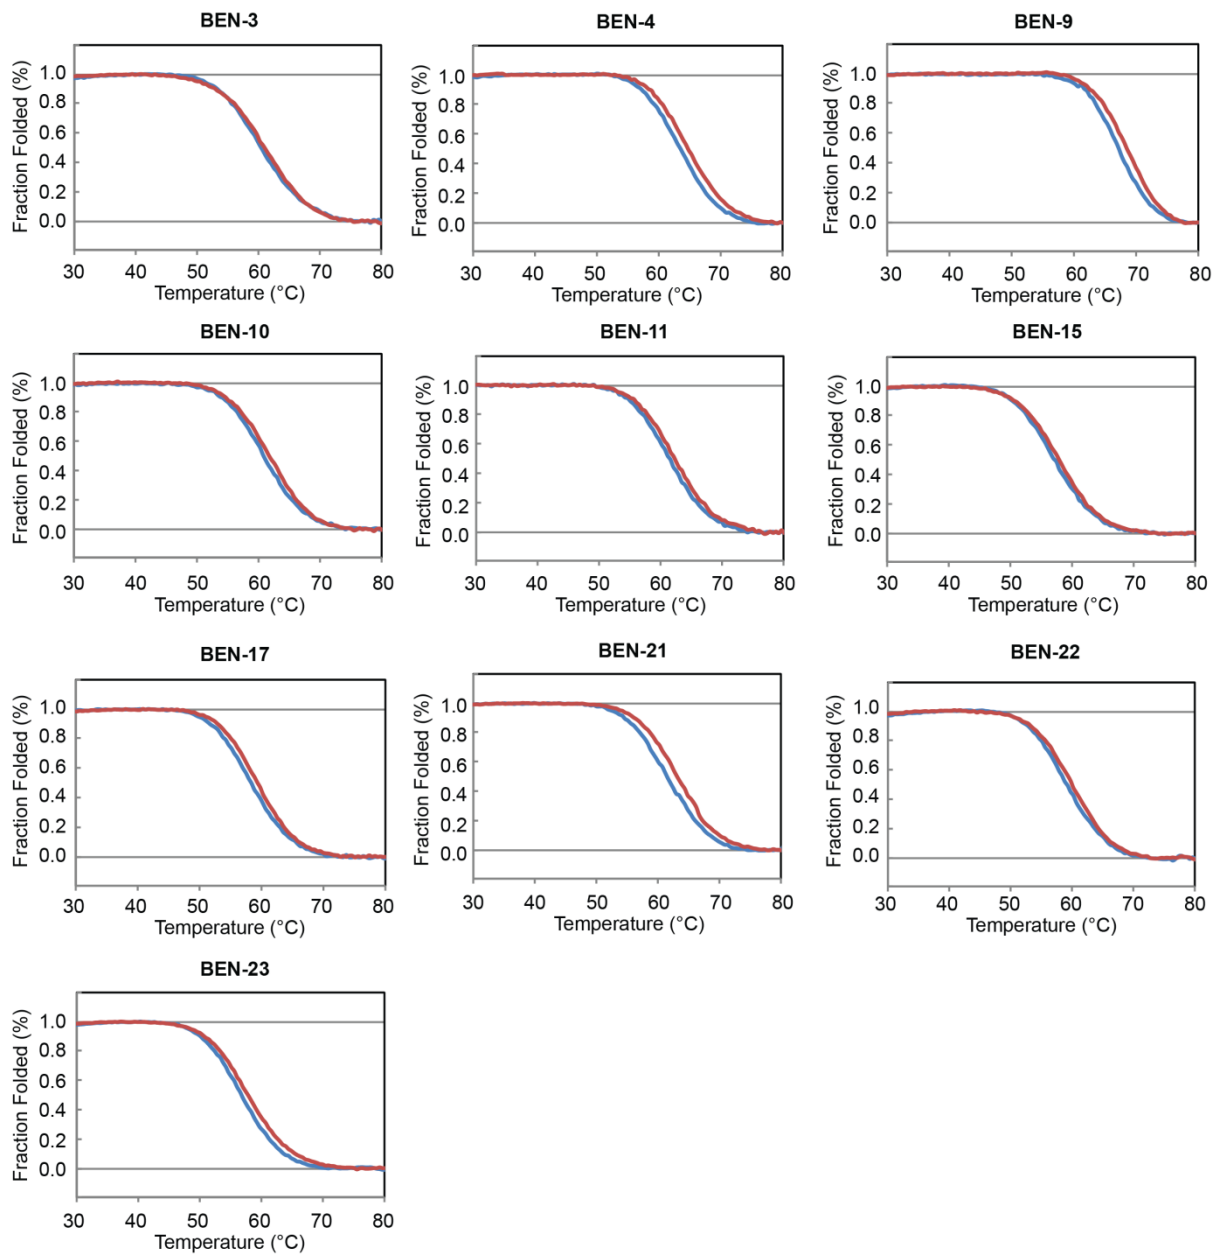

**Figure S9.** Fraction folded curves from UV melting experiments of modified (3+1) G-quadruplex forming sequences containing single BEN substitutions

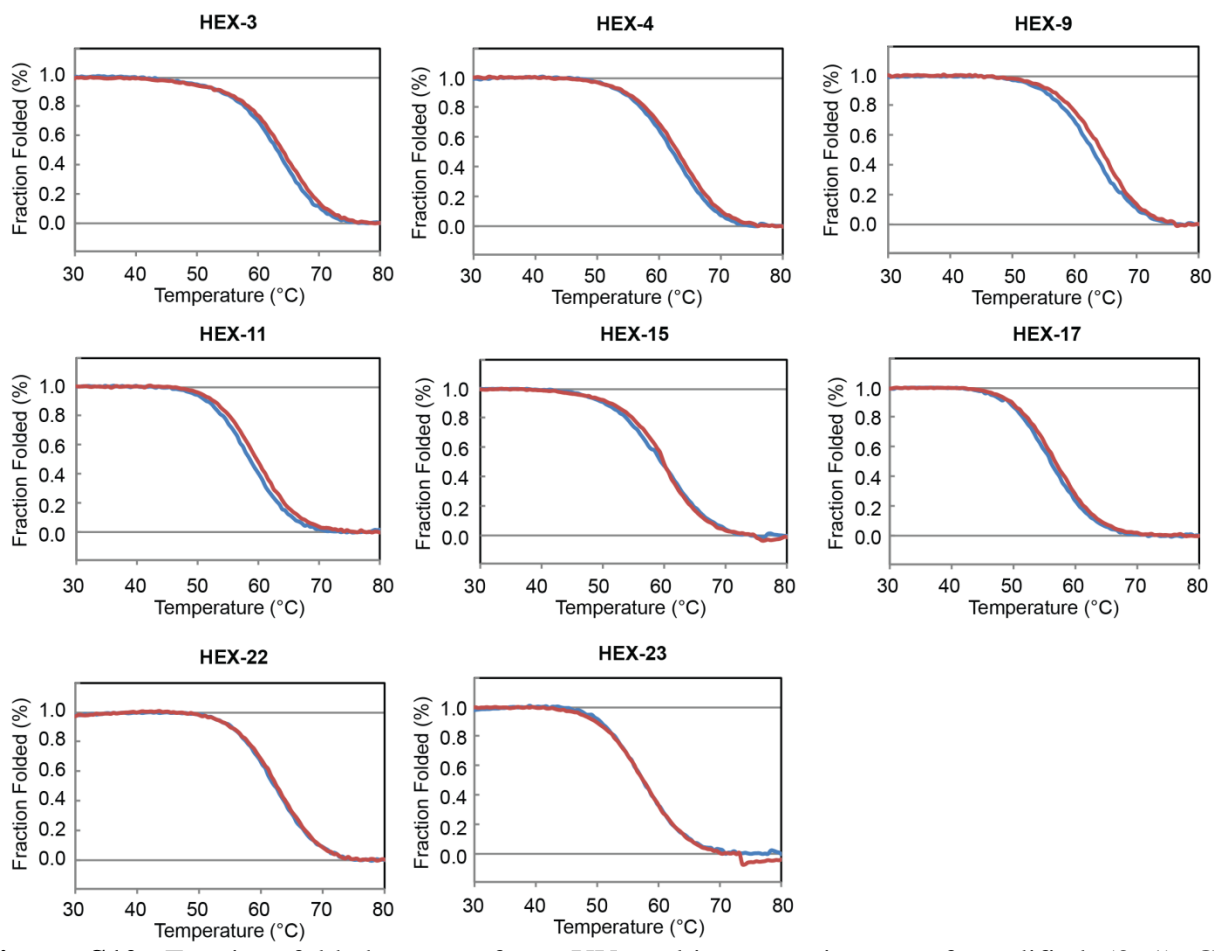

**Figure S10.** Fraction folded curves from UV melting experiments of modified (3+1) G-quadruplex forming sequences containing single HEX substitutions



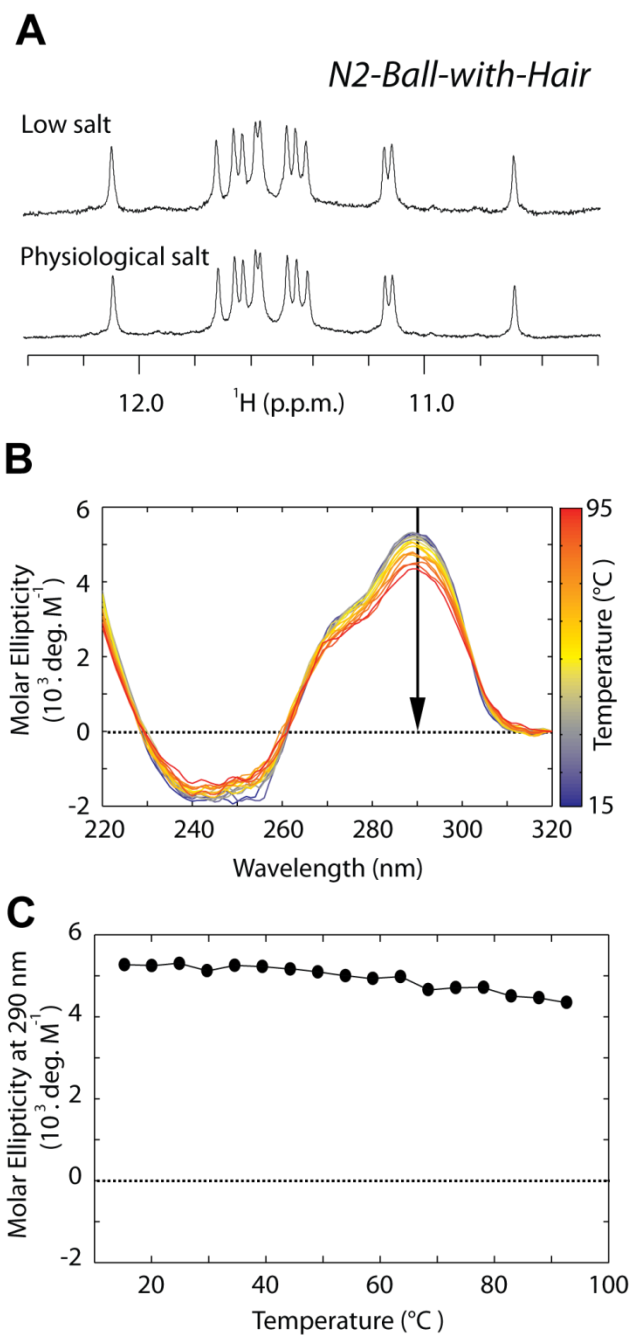

**Figure S11.** Design of a  $\text{HexG}$  modified “Ball-with-hair” G-quadruplex nano-scaffold: **(A)** NMR spectra of N2-Ball-with-Hair sequence in “low” and “physiological” salt conditions shows the same structure is formed. **(B)** Temperature dependent CD spectra demonstrate the incredible stability of the “Ball-with-hair” nano-scaffold in physiological salt conditions. **(C)** Projection of CD intensity at 290 nm over varying temperatures.

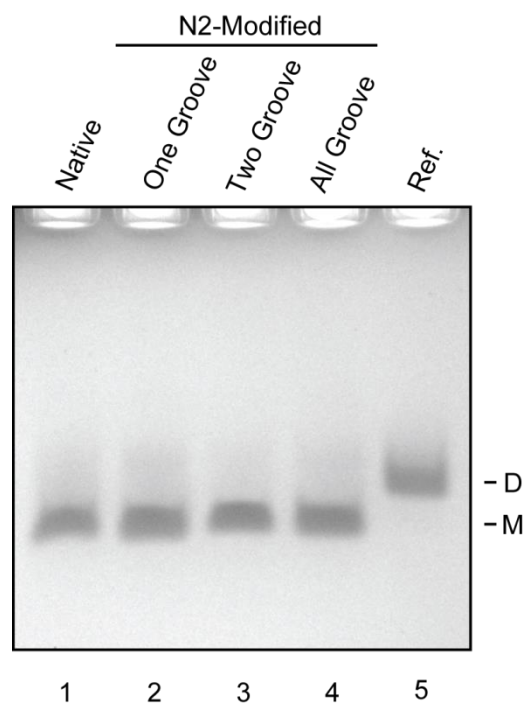

**Figure S12.** Non-denaturing PAGE investigating G-quadruplex nano-scaffold stoichiometry: (lane 1) *Native* sequence and known monomer, (lane 2) *N2-One groove*, (lane 3) *N2-Two Groove*, (lane 4) *N2-All Groove*, (lane 5) Reference sequence  $d(G_3T)_4$  known to form a dimer G-quadruplex. Monomer (M) and Dimer (D) migration rates are indicated at right
